# Supplementary material for: Biochemical composition, β-glucan and phenolic content of a marine diatom Chaetoceros muelleri cultivated in Guillard’s modified medium
Source: PeerJ. 2025 Sep 30;13:e20098. doi: 10.7717/peerj.20098 (PMC12493710; doi:10.7717/peerj.20098)
Supplement: Supplemental Information 8 [file peerj-13-20098-s008.xlsx]

## Sheet: Sheet1
TH inoc 0.74x10^6 cell/ml, 800 ml in 4000 ml, started 0.12x10^6 cell/ml
CH inoc 4.00x10^6 cell/ml, 800 ml in 4000 ml, started 0.68x10^6 cell/ml
Guillard f medium
cell density x10^6 cell/ml									Specific growth rate constant
	Day0	Day1	Day2	Day3	Day4	Day5	Day6		Day1	Day2	Day3	Day4	Day5
TH1	0.12	0.3	0.55	0.6	0.65	0.66	0.64		0.0381788	0.0317172	0.0223533	0.0175988	0.0142062
TH2	0.12	0.25	0.48	0.65	0.68	0.7	0.65		0.030582	0.0288811	0.023465	0.0180688	0.0146966
TH3	0.12	0.3	0.5	0.67	0.7	0.68	0.64		0.0381788	0.0297316	0.0238859	0.0183707	0.014455
								Average	0.0356465	0.03011	0.0232347	0.0180127	0.0144526
								SD	0.00438597	0.00145541	0.000791828	0.000389016	0.000245178
CH1	0.67	1.6	3.5	4.25	5	5.6	5.5		0.03627	0.0344425	0.0256583	0.0209366	0.0176937	0.0146196
CH2	0.67	2	3.35	4.4	4.85	5.2	5.15		0.0455677	0.03353	0.02614	0.0206193	0.0170761	0.014163
CH3	0.67	2.2	3.25	4.25	4.92	5.12	5		0.049539	0.0328986	0.0256583	0.0207686	0.0169469	0.0139577
								Average	0.0437922	0.0336237	0.0258189	0.0207749	0.0172389	0.0142468
								SD	0.0068103	0.000776214	0.000278135	0.000158734	0.000399112	0.000338798
Average	Day0	Day1	Day2	Day3	Day4	Day5	Day6
TH	0.12	0.283333	0.51	0.64	0.676667	0.68	0.643333
CH	0.67	1.93333	3.36667	4.3	4.92333	5.30667	5.21667
SD	Day0	Day1	Day2	Day3	Day4	Day5	Day6
TH	0	0.0288675	0.0360555	0.0360555	0.0251661	0.02	0.0057735
CH	0	0.305505	0.125831	0.0866025	0.0750555	0.257164	0.25658
Note:
CH>> Chaetoceros muelleri
TH>> Thalassiosira weissflogii
