# Supplementary material for: Biochemical composition, β-glucan and phenolic content of a marine diatom Chaetoceros muelleri cultivated in Guillard’s modified medium
Source: PeerJ. 2025 Sep 30;13:e20098. doi: 10.7717/peerj.20098 (PMC12493710; doi:10.7717/peerj.20098)
Supplement: Supplemental Information 9 [file peerj-13-20098-s009.xlsx]

## Sheet: Sheet1
สาร	mg/L	g/L	Mw (g/mol)	mM
NaNO3	168.3	0.1683	84.9947	1.98012
Na2 HPO4 H2O	12	0.012	159.974	0.0750121
FeCl3 6H2O	5.8	0.0058	270.29	0.022
Na2 EDTA 2H2O	20	0.02	372.24	0.0537288
Na2 SiO3 9H2O	66	0.066	284.2	0.232231
CuSO4 5H2O	1.96	0.00196	249.69	0.00784973
ZnSO4 7H2O	4.4	0.0044	287.56	0.0153012
Na2 MoO4 2H2O	1.26	0.00126	241.95	0.00520769
MnCl2 4H2O	36	0.036	197.91	0.181901
CoCl2 6H2O	2	0.002	237.93	0.0084
	µg/L
vitamin B1	0.4	4e-07	265.36	1.51x10-6
vitamin B12	2	2e-06	1355.37	1.48x10-6
biotin	100	0.0001	244.31	4.09x10-4
